# Supplementary material for: The Effect of a Bile Acid Sequestrant on Glucose Metabolism in Subjects With Type 2 Diabetes
Source: PubMed Central journal article supplement — Diabetes. 2013 Mar 14;62(4):1094–101. doi: 10.2337/db12-0923 (PMC3609563; doi:10.2337/db12-0923), 2013-03-14

SUPPLEMENTARY DATA

**Supplementary Table 1.** Baseline characteristics of the participants as randomized to treatment group.

|                                   | <b>Colesevelam</b> | <b>Placebo</b> | <b>P-value</b> |
|-----------------------------------|--------------------|----------------|----------------|
| <b>Age (Years)</b>                | 62.6 ± 1.3         | 60.2 ± 1.5     | 0.22           |
| <b>HbA<sub>1c</sub> (%)</b>       | 6.7 ± 0.1          | 6.8 ± 0.1      | 0.88           |
| <b>Weight (kg)</b>                | 92 ± 3             | 93 ± 3         | 0.78           |
| <b>Fasting Glucose (mmol/l)</b>   | 7.0 ± 0.3          | 7.4 ± 0.4      | 0.54           |
| <b>BMI (kg/m<sup>2</sup>)</b>     | 30.8 ± 1.0         | 30.4 ± 0.9     | 0.78           |
| <b>Total Cholesterol (mmol/l)</b> | 4.35 ± 0.19        | 4.33 ± 0.14    | 0.93           |
| <b>Triglycerides (mmol/l)</b>     | 1.67 ± 0.15        | 1.88 ± 0.27    | 0.68           |
| <b>HDL (mmol/l)</b>               | 1.18 ± 0.06        | 1.27 ± 0.08    | 0.33           |
| <b>LDL (mmol/l)</b>               | 2.50 ± 0.17        | 2.31 ± 0.13    | 0.38           |

SUPPLEMENTARY DATA

**Supplementary Table 2.** Tabulated Lipid Values (Means  $\pm$  SEMs).

|                                   | <b>Colesevelam</b> |                 | <b>Placebo</b>  |                 |
|-----------------------------------|--------------------|-----------------|-----------------|-----------------|
|                                   | Baseline           | Treatment       | Baseline        | Treatment       |
| <b>Total Cholesterol (mmol/l)</b> | 4.35 $\pm$ 0.19    | 3.60 $\pm$ 0.16 | 4.33 $\pm$ 0.14 | 4.00 $\pm$ 0.14 |
| <b>Triglycerides (mmol/l)</b>     | 1.67 $\pm$ 0.15    | 2.19 $\pm$ 0.19 | 1.88 $\pm$ 0.27 | 1.55 $\pm$ 0.18 |
| <b>HDL (mmol/l)</b>               | 1.18 $\pm$ 0.06    | 1.08 $\pm$ 0.10 | 1.27 $\pm$ 0.08 | 1.20 $\pm$ 0.07 |
| <b>LDL (mmol/l)</b>               | 2.50 $\pm$ 0.17    | 1.59 $\pm$ 0.14 | 2.31 $\pm$ 0.13 | 2.09 $\pm$ 0.12 |

SUPPLEMENTARY DATA

**Supplementary Table 3.** AUC and AAB values for parameters measured. \*AAB Meal Ra not calculated since baseline value was 0 and AUC reported in the text. ° Paired t-test. α LS Mean ANCOVA

| Parameter Measured*                       | Colesevelam  |              | Placebo      |              | Colesevelam | Placebo    | P-Value <sup>α</sup> |
|-------------------------------------------|--------------|--------------|--------------|--------------|-------------|------------|----------------------|
|                                           | Baseline     | Treatment    | Baseline     | Treatment    | LS_Mean     | LS_Mean    |                      |
| AUC Glucose (mmol per 6hr)                | 3286 ± 142   | 3028 ± 130   | 3394 ± 140   | 3523 ± 168   | 3078±75     | 3472±75    | 0.0007               |
| P-Value <sup>°</sup>                      | 0.003        |              | 0.10         |              |             |            |                      |
| AAB Glucose (mmol per 6hr)                | 748 ± 86     | 667 ± 88     | 742 ± 97     | 809 ± 94     | 664±56      | 812±56     | 0.07                 |
| P-Value <sup>°</sup>                      | 0.13         |              | 0.31         |              |             |            |                      |
| AAB <sub>240</sub> Glucose (mmol per 4hr) | 912 ± 80     | 827 ± 84     | 876 ± 84     | 954 ± 70     | 813±43      | 968±43     | 0.01                 |
| P-Value <sup>°</sup>                      | 0.09         |              | 0.09         |              |             |            |                      |
| AUC Insulin (nmol per 6hr)                | 67.3 ± 7.9   | 63.9 ± 6.1   | 72.7 ± 8.3   | 81.9 ± 11.6  | 66.6±4.2    | 79.1±4.2   | 0.04                 |
| P-Value <sup>°</sup>                      | 0.33         |              | 0.23         |              |             |            |                      |
| AAB Insulin (nmol per 6hr)                | 49.9 ± 5.9   | 47.8 ± 4.8   | 54.8 ± 6.8   | 63.5 ± 10.4  | 50.6±3.8    | 60.7±3.8   | 0.07                 |
| P-Value <sup>°</sup>                      | 0.31         |              | 0.18         |              |             |            |                      |
| AUC C-Peptide (nmol per 6hr)              | 920 ± 54     | 876 ± 50     | 929 ± 71     | 995 ± 80     | 880±32      | 991±32     | 0.018                |
| P-Value <sup>°</sup>                      | 0.14         |              | 0.07         |              |             |            |                      |
| AAB C-Peptide (nmol per 6hr)              | 531 ± 37     | 504 ± 32     | 532 ± 50     | 599 ± 60     | 504±24      | 598±24     | 0.009                |
| P-Value <sup>°</sup>                      | 0.18         |              | 0.03         |              |             |            |                      |
| AUC Glucagon (ng/l per 6hr)               | 39052 ± 2830 | 40464 ± 2837 | 38464 ± 2259 | 38954 ± 2130 | 40206±1121  | 39212±1121 | 0.54                 |
| P-Value <sup>°</sup>                      | 0.24         |              | 0.67         |              |             |            |                      |
| AAB Glucagon (ng/l per 6hr)               | 9556 ± 1207  | 9362 ± 1237  | 8451 ± 1065  | 8880 ± 1000  | 9029±906    | 9213±906   | 0.89                 |
| P-Value <sup>°</sup>                      | 0.84         |              | 0.69         |              |             |            |                      |
| AUC GLP-1 (nmol per 3hr)                  | 5.20 ± 0.44  | 5.08 ± 0.33  | 5.82 ± 0.63  | 5.18 ± 0.42  | 5.25±0.23   | 5.01±0.23  | 0.46                 |
| P-Value <sup>°</sup>                      | 0.86         |              | 0.23         |              |             |            |                      |
| AAB GLP-1 (nmol per 3hr)                  | 1.90 ± 0.28  | 1.18 ± 0.35  | 2.47 ± 0.55  | 1.71 ± 0.44  | 1.35±0.31   | 1.55±0.31  | 0.66                 |
| P-Value <sup>°</sup>                      | 0.04         |              | 0.06         |              |             |            |                      |
| AUC EGP (μmol per 6hr)                    | 3041 ± 110   | 2986 ± 72    | 3192 ± 119   | 3051 ± 143   | 3002±113    | 3034±113   | 0.84                 |
| P-Value <sup>°</sup>                      | 0.59         |              | 0.43         |              |             |            |                      |
| AUB EGP (μmol per 6hr)                    | -3225 ± 136  | -3150 ± 151  | -3189 ± 218  | -3398 ± 180  | -3139±128   | -3408±128  | 0.15                 |
| P-Value <sup>°</sup>                      | 0.47         |              | 0.26         |              |             |            |                      |
| AUC Rd (μmol per 6hr)                     | 8642 ± 414   | 8155 ± 314   | 8784 ± 403   | 8761 ± 382   | 8201±228    | 8714±228   | 0.12                 |
| P-Value <sup>°</sup>                      | 0.35         |              | 0.93         |              |             |            |                      |
| AAB Rd (μmol per 6hr)                     | 2418 ± 311   | 2046 ± 232   | 2390 ± 412   | 2369 ± 399   | 2037±227    | 2378±227   | 0.30                 |
| P-Value <sup>°</sup>                      | 0.44         |              | 0.93         |              |             |            |                      |

SUPPLEMENTARY DATA

**Supplementary Figure 1.** LS Means for integrated glucose (AUC), Insulin (AAB), Glucagon (AAB) and C-Peptide (AAB) responses after 12 weeks of treatment with colesevelam or Placebo. Note that SE are based on pooled residual variation.

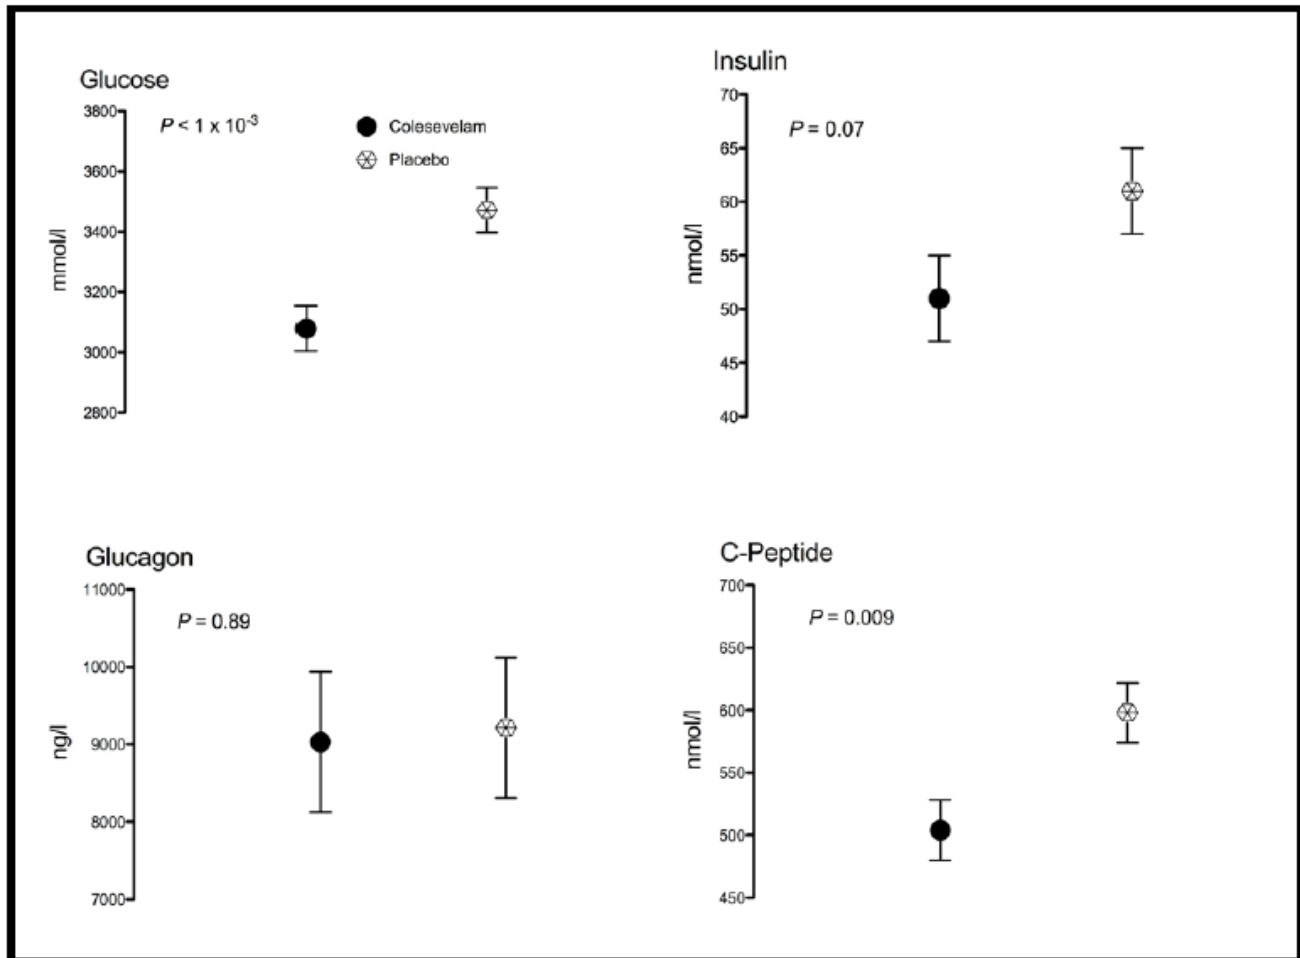

SUPPLEMENTARY DATA

**Supplementary Figure 2.** LS Mean for integrated (AUC) GLP-1 responses after 12 weeks of treatment with colesevelam or Placebo.

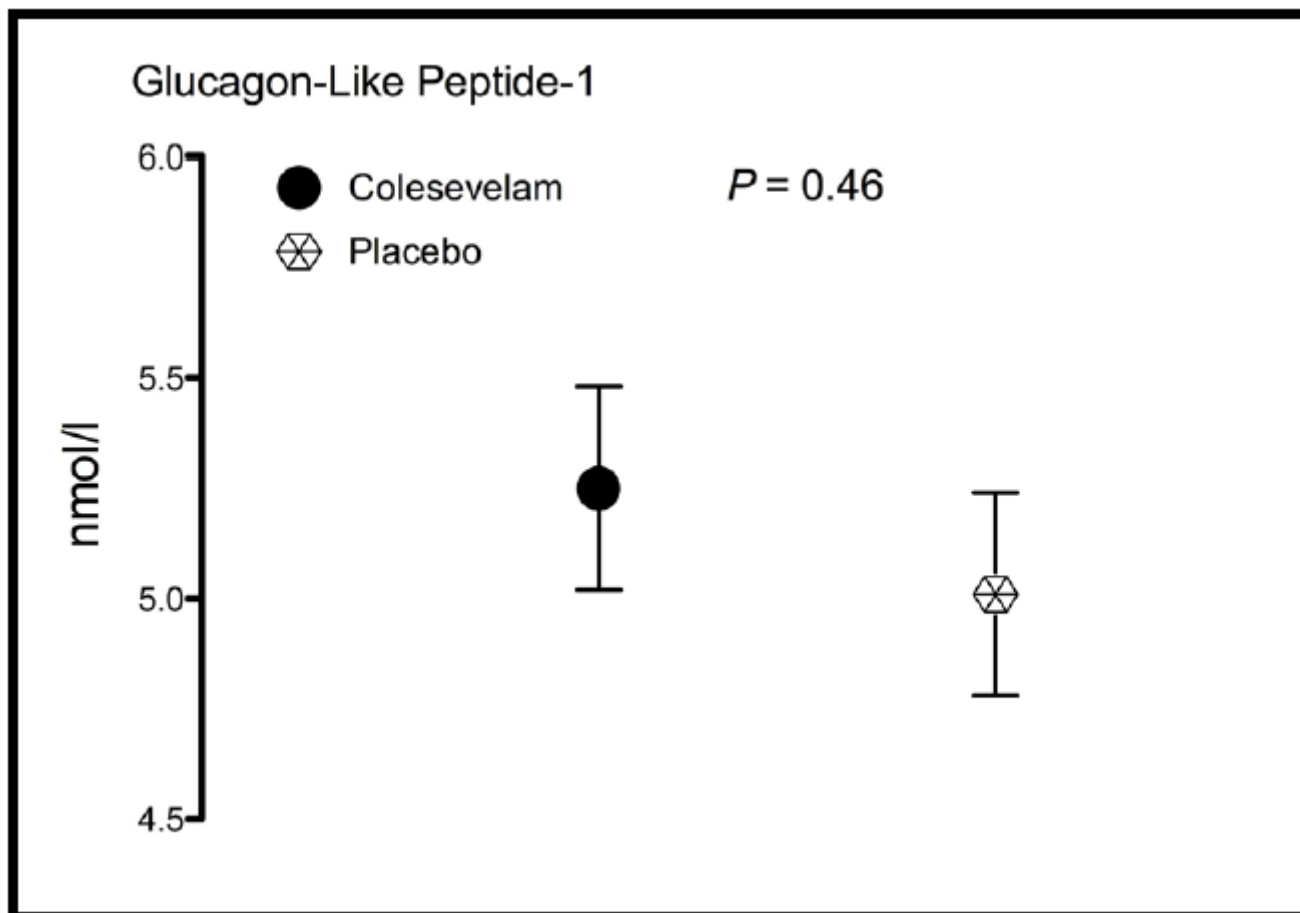

SUPPLEMENTARY DATA

**Supplementary Figure 3.** LS Means for integrated EGP (AAB), Meal Ra (AUC) and Rd (AAB) after 12 weeks of treatment with colesevelam or Placebo. Note that SE are based on pooled residual variation.

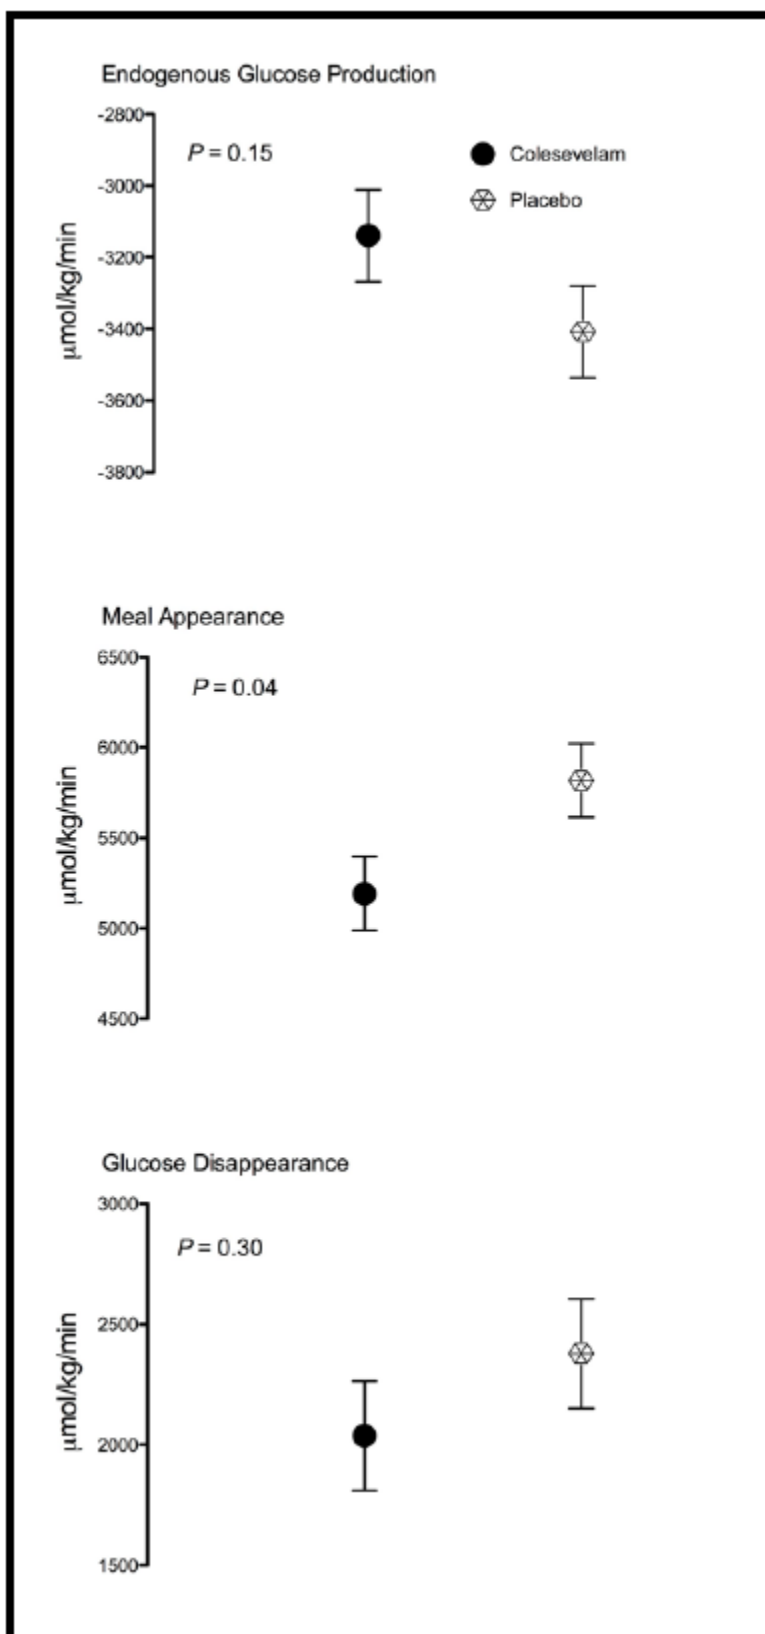

SUPPLEMENTARY DATA

**Supplementary Figure 4.** LS Means for indices of insulin secretion and action after 12 weeks of treatment with colesevelam or Placebo.

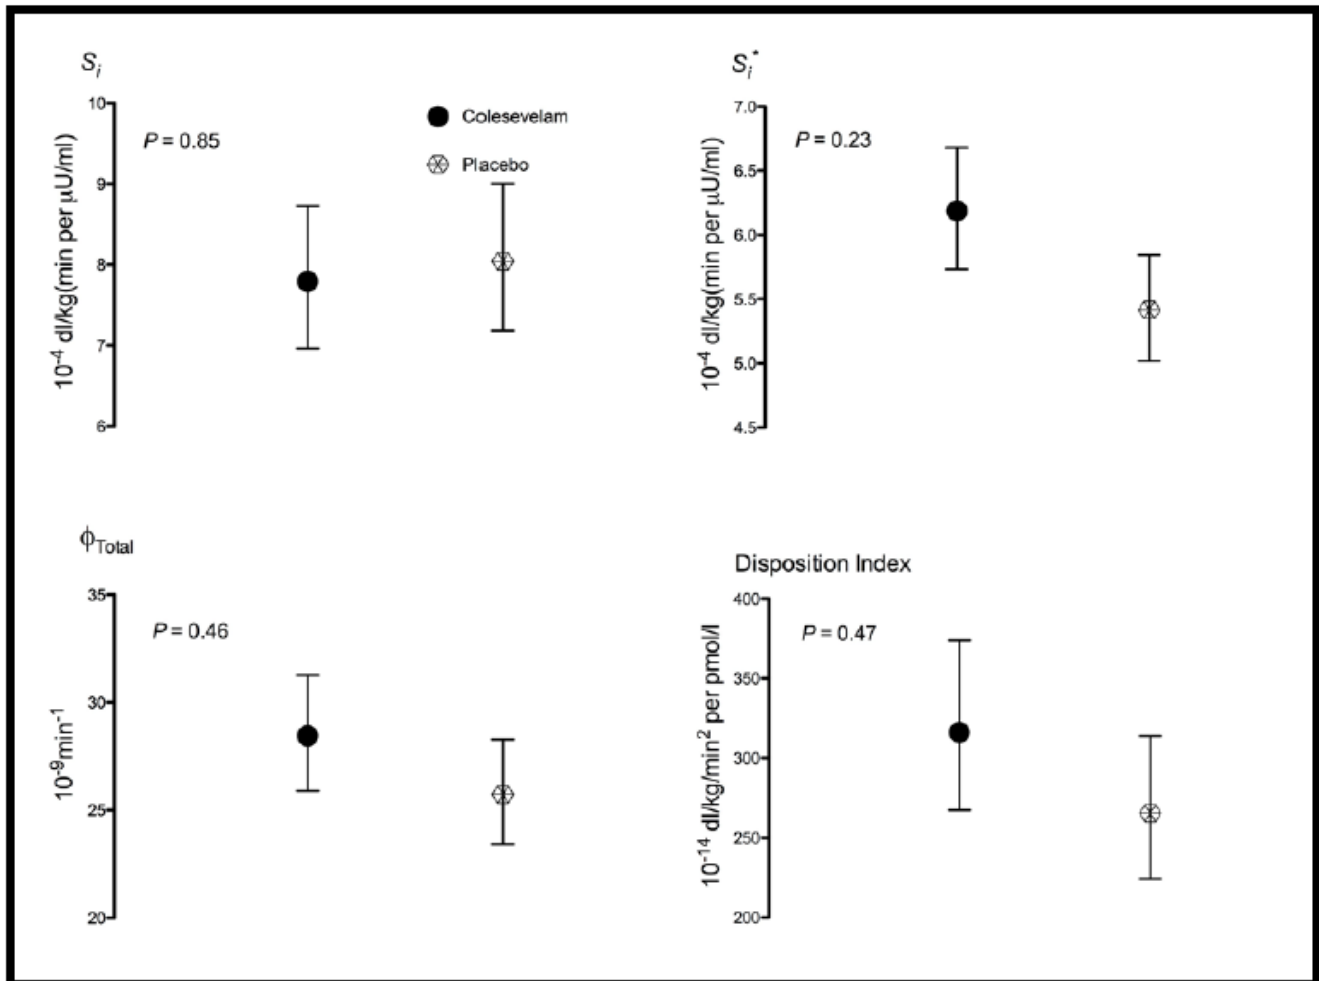

SUPPLEMENTARY DATA

**Supplementary Figure 5.** Lipid profiles at baseline and after 12 weeks of treatment with colesevlam or placebo. \*  $p < 0.05$  from within-group baseline value (paired, 2-tailed t-test).  $\alpha$   $p < 0.05$  for post-treatment values in each group (unpaired, 2-tailed t-test).

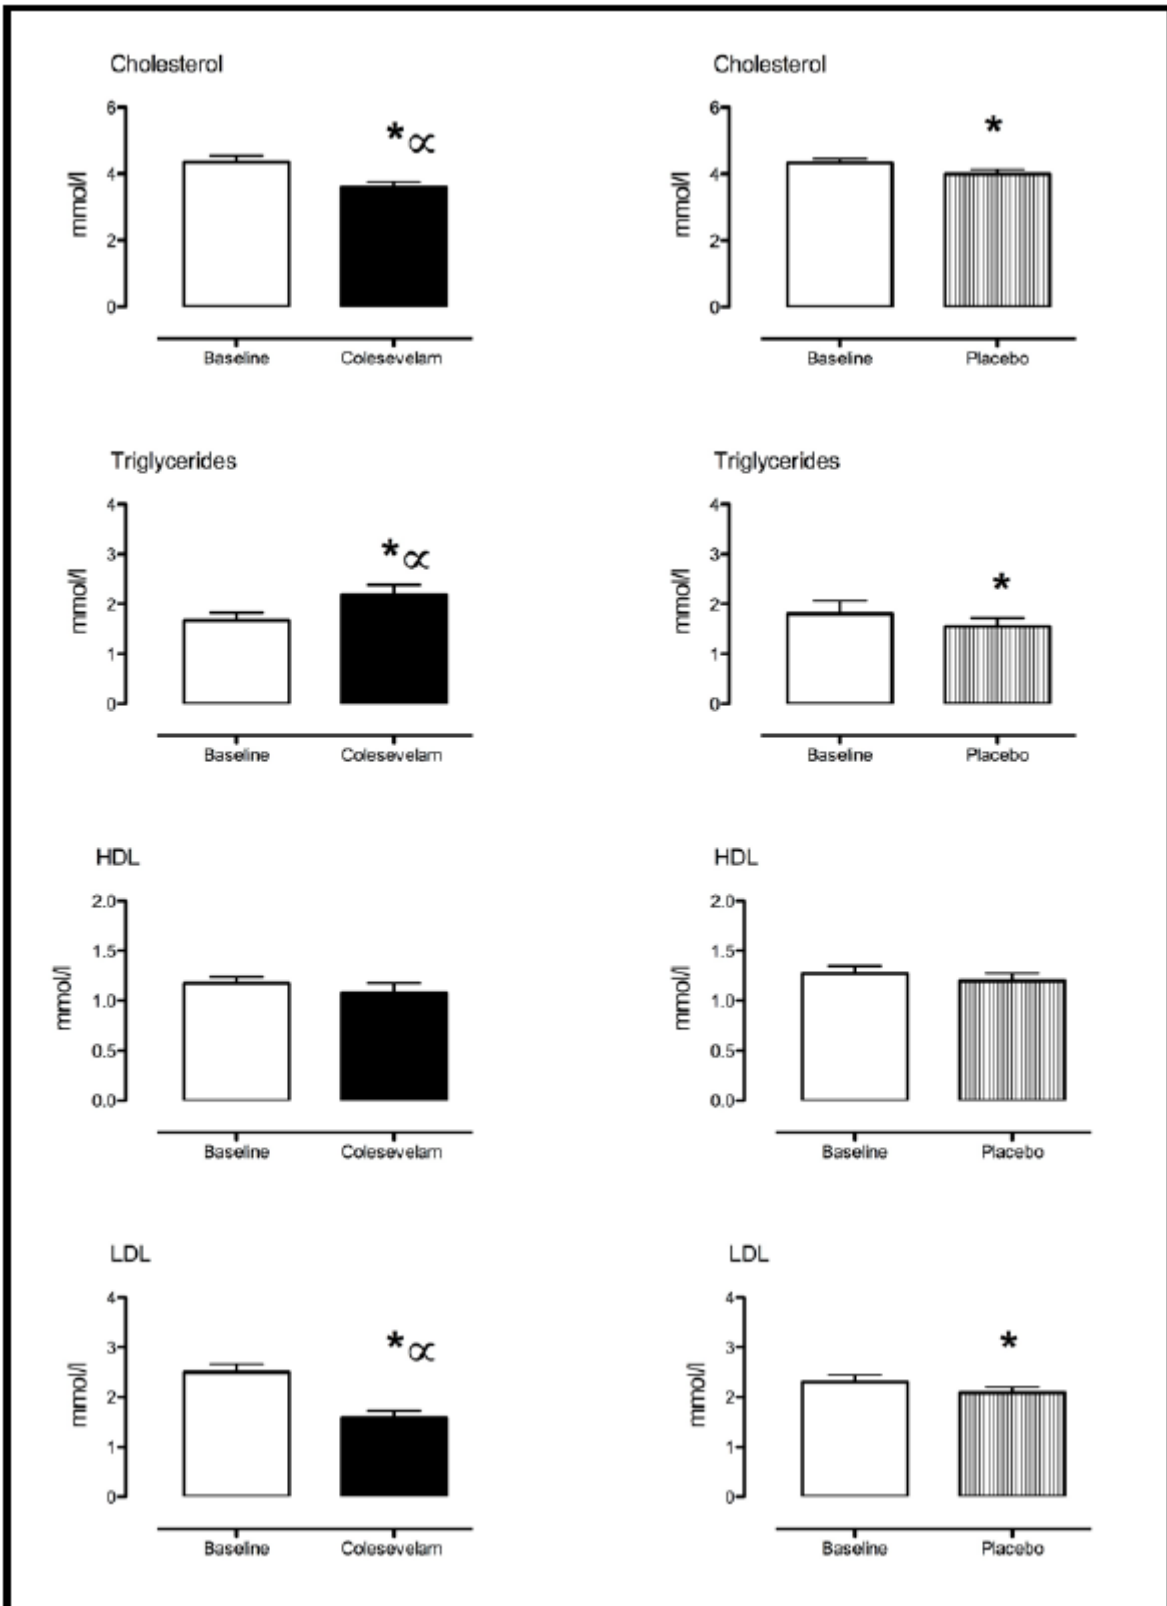

Supplement: supp_db12-0923_DB120923SupplementaryData.pdf [file supp_db12-0923_DB120923SupplementaryData.pdf]
